# Supplementary material for: Blivande svensklärare och sociala medier: Förutsättningar för integration av sociala medier i språkundervisning
Source: MDPI journal article supplement (doi:10.3390/toxins16020070), 2012-01-01
Supplement: s1 [file s1]

## Supplementary Materials: Spatial and Temporal Variability of Saxitoxin-Producing Cyanobacteria in U.S. Urban Lakes

Table S1. Sampling sites information.

|                      |                      | Latitude        | Longitude |
|----------------------|----------------------|-----------------|-----------|
| Cincinnati, OH, USA  | <b>Campbell Lake</b> | <b>39.23564</b> | -84.7956  |
|                      | Winton Woods Lake    | 39.25898        | -84.4951  |
|                      | Parkys Farm          | 39.25135        | -84.533   |
|                      | Sharon Woods Lake    | 39.28554        | -84.3891  |
|                      | South Lake           | 38.97211        | -94.6734  |
| Kansas City, MO, USA | Tomahawk Creek Lake  | 38.92319        | -94.626   |
|                      | Lake of the Woods    | 38.99513        | -94.5194  |
|                      | Chaumiere Lake       | 38.17292        | -94.5385  |
|                      | Big 11 Lake          | 38.11745        | -94.6374  |
| Denver, CO, USA      | Sloans Lake          | 39.75176        | -105.048  |
|                      | Rocky Mt. Lake       | 39.78239        | -105.028  |

Table S2. Parameters for SYBR® Green qPCR assays.

| Assay                        | Primer sequences (5' to 3') <sup>a</sup> | Target      | T <sub>m</sub> (°C) | Amplicon (bp) | Reference         |
|------------------------------|------------------------------------------|-------------|---------------------|---------------|-------------------|
| Partial gene sequencing qPCR | CGCTATACCCACGGATTTGTT                    | <i>sxtA</i> | 60                  | 395           | (Lu et al., 2019) |
|                              | GGGATCAGCAGTAGTCCATCTA                   |             |                     |               |                   |
|                              | GCGGGACTTTATGCTCTACTAC                   | <i>sxtA</i> | 60                  | 111           | This study        |
|                              | TACTCCGTCATCGGCATTTG                     |             |                     |               |                   |

<sup>a</sup>: For each assay, the sense primer is listed in the first line, while the anti-sense primer is listed in the second line.

T<sub>m</sub>: Annealing temperature of the qPCR assay.

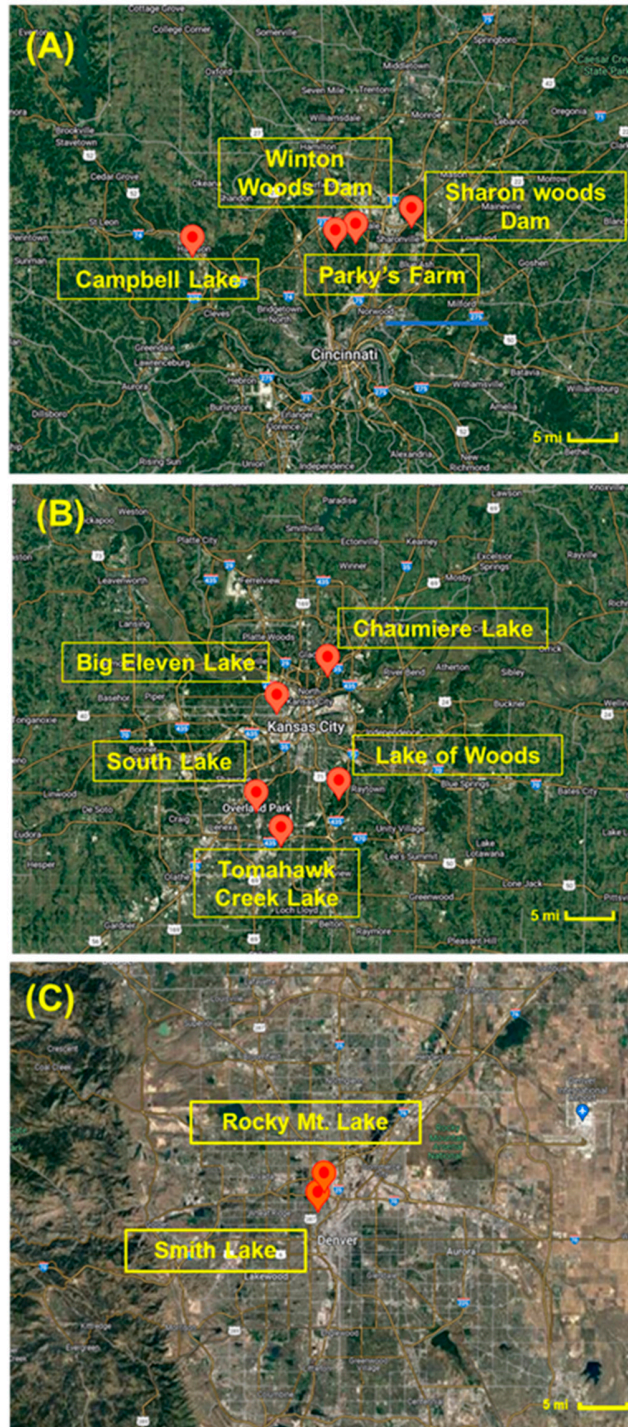

**Figure S1.** Sampling sites in the urban lakes of Cincinnati (A), Kansas City (B), and Denver (C).

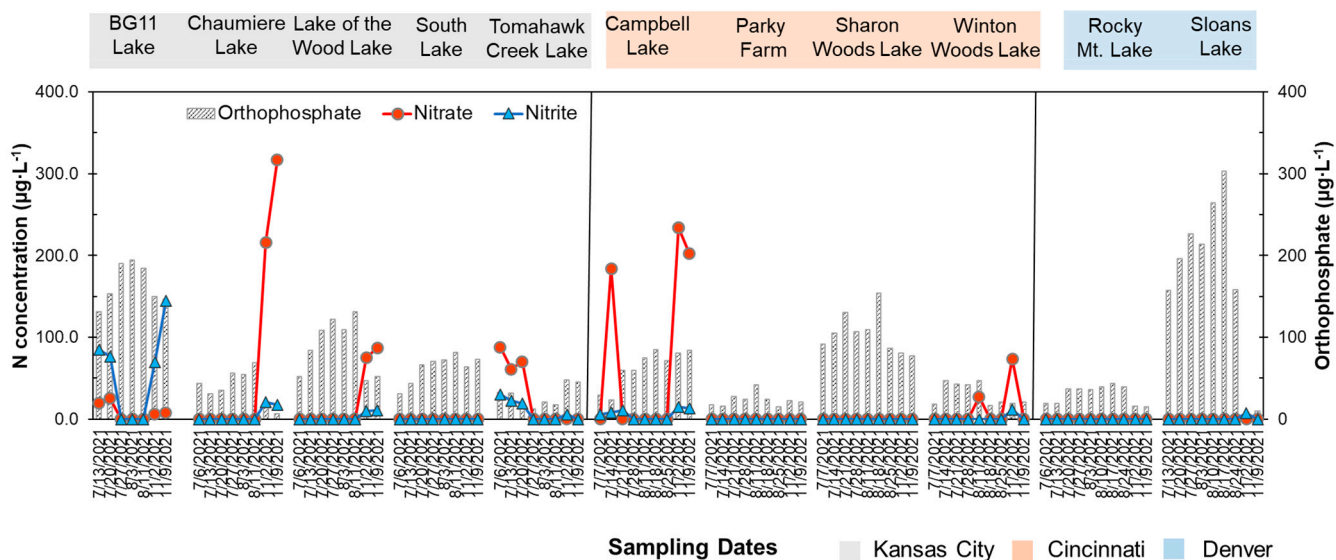

**Figure S2.** Nitrite (blue), nitrate (red), orthophosphate (gray), and concentrations in the lakes of Kansas City, Cincinnati, and Denver.

**Table S3.** Table S3. Physicochemical water parameters in the lakes of Kansas City, Cincinnati, and Denver. The numbers below are the average values of the parameters collected from the sampling period, presented as average  $\pm$  standard deviation.

|                     | Temp.<br>(°C)  | Conductivity<br>(uS/cm) | pH             | DO<br>(mg/L)   | PC(ppb)         | CHL<br>(ppb)     | PC:C<br>HL    | Cell<br>(#mL<br>) | Alka-<br>linity<br>(mg/L) | Chlo-<br>ride<br>(mg/L) | Sulfate<br>(mg/L) | Nitrate<br>(µg/L) | Nitrite<br>(µg/L) | Orthophos-<br>phate as P<br>(µg/L) |
|---------------------|----------------|-------------------------|----------------|----------------|-----------------|------------------|---------------|-------------------|---------------------------|-------------------------|-------------------|-------------------|-------------------|------------------------------------|
| Big 11              | 28.2 $\pm$ 1.2 | 1159 $\pm$ 23.3         | 7.6 $\pm$ 0.1  | 6.14 $\pm$ 2.2 | 127.5 $\pm$ 8.6 | 38.1 $\pm$ 18.2  | 3.2 $\pm$ 0.8 | 5.2E+05           | 141.8 $\pm$ 2.3           | 193.2 $\pm$ 6.97        | 140 $\pm$ 7.6     | 8.9 $\pm$ 12.3    | 32.1 $\pm$ 44.0   | 170.2 $\pm$ 27.3                   |
| Chaumiere           | 27.1 $\pm$ 0.9 | 442.3 $\pm$ 20.2        | 8.0 $\pm$ 0.2  | 27.7 $\pm$ 1.5 | 26.4 $\pm$ 8.9  | 59.7 $\pm$ 12.4  | 0.4 $\pm$ 0.1 | 9.8E+04           | 96.3 $\pm$ 3.2            | 54.6 $\pm$ 1.8          | 30.8 $\pm$ 3.0    | 36.5 $\pm$ 40.9   | 11.9 $\pm$ 13.6   | 21.8 $\pm$ 8.3                     |
| Lake of the Woods   | 27.3 $\pm$ 1.4 | 555.3 $\pm$ 307.2       | 7.85 $\pm$ 0.2 | 7.3 $\pm$ 3.7  | 17.8 $\pm$ 3.5  | 90.4 $\pm$ 250.8 | 20 $\pm$ 0.0  | 1.3E+04           | 176.3 $\pm$ 6.1           | 46.1 $\pm$ 3.7          | 28.7 $\pm$ 2.1    | 0 $\pm$ 0         | 0 $\pm$ 0         | 100.9 $\pm$ 28.9                   |
| South Lake          | 26.5 $\pm$ 1.2 | 383.8 $\pm$ 17.1        | 7.7 $\pm$ 0.1  | 27.0 $\pm$ 5.0 | 105.9 $\pm$ 5.4 | 48.7 $\pm$ 20.5  | 2.3 $\pm$ 1.0 | 4.5E+05           | 98.0 $\pm$ 7.4            | 55.7 $\pm$ 13.9         | 12.4 $\pm$ 1.2    | 0 $\pm$ 0         | 0 $\pm$ 0         | 60.7 $\pm$ 19.2                    |
| Tomahawk Creek Lake | 27.4 $\pm$ 1.0 | 350.5 $\pm$ 27.2        | 8.4 $\pm$ 0.4  | 9.8 $\pm$ 2.8  | 90.6 $\pm$ 74.0 | 47.2 $\pm$ 171.9 | 4 $\pm$ 1.1   | 2.3E+04           | 100.4 $\pm$ 13.0          | 6 $\pm$ 5.5             | 21.1 $\pm$ 4.9    | 0 $\pm$ 0         | 0 $\pm$ 0         | 48.2 $\pm$ 14.1                    |
| Campbell Lake       | 24.2 $\pm$ 0.9 | 692 $\pm$ 8.7           | 9.19 $\pm$ 0.1 | 7.6 $\pm$ 1.0  | 83.6 $\pm$ 62.4 | 38.0 $\pm$ 132.1 | 13 $\pm$ 1.1  | 5.8E+03           | 118.1 $\pm$ 2.3           | 103.8 $\pm$ 2.54        | 80.2 $\pm$ 1.7    | 0 $\pm$ 0         | 0 $\pm$ 0         | 216.8 $\pm$ 53.5                   |
| Parky's Farm        | 26.6 $\pm$ 0.6 | 869.1 $\pm$ 33.6        | 8.7 $\pm$ 0.3  | 12.0 $\pm$ 2.7 | 13.6 $\pm$ 4.2  | 38.8 $\pm$ 23.4  | 0.4 $\pm$ 0.3 | 3.6E+04           | 83.5 $\pm$ 12.0           | 128 $\pm$ 6.0           | 150 $\pm$ 7.2     | 526 $\pm$ 96      | 29.9 $\pm$ 9.31   | 24.3 $\pm$ 10.8                    |
| Sharon Woods        | 25.3 $\pm$ 1.4 | 399.3 $\pm$ 22.7        | 8.9 $\pm$ 0.1  | 10.0 $\pm$ 1.4 | 7.1 $\pm$ 9.7   | 13.4 $\pm$ 15.5  | 0.4 $\pm$ 0.3 | 7.6E+03           | 100.7 $\pm$ 5.7           | 50.0 $\pm$ 5.0          | 24.8 $\pm$ 1.8    | 0 $\pm$ 0         | 0 $\pm$ 0         | 33.6 $\pm$ 9.2                     |
| Winton Woods        | 28.7 $\pm$ 1.2 | 278.0 $\pm$ 57.0        | 8.6 $\pm$ 0.3  | 39.9 $\pm$ 1.8 | 25.3 $\pm$ 10.0 | 43.5 $\pm$ 11.5  | 0.5 $\pm$ 0.1 | 7.9E+03           | 117.0 $\pm$ 13.8          | 34.9 $\pm$ 16.5         | 11.1 $\pm$ 2.0    | 3.04 $\pm$ 9.13   | 0 $\pm$ 0         | 31.2 $\pm$ 13.1                    |
| Rocky Mt. Lake      | 25.6 $\pm$ 2.4 | 439.2 $\pm$ 30.5        | 8.1 $\pm$ 0.0  | 11.8 $\pm$ 2.5 | 17.7 $\pm$ 10.1 | 37.1 $\pm$ 15.1  | 0.4 $\pm$ 0.1 | 4.4E+03           | 203.4 $\pm$ 11.8          | 40.4 $\pm$ 4.1          | 129.3 $\pm$ 3.1   | 181.5 $\pm$ 15.6  | 5.68 $\pm$ 7.04   | 49.7 $\pm$ 22.8                    |
| Sloans Lake         | 26.4 $\pm$ 0.9 | 173.9 $\pm$ 33.2        | 7.7 $\pm$ 0.4  | 45.6 $\pm$ 1.9 | 23.4 $\pm$ 28.7 | 40.4 $\pm$ 14.6  | 0.8 $\pm$ 1.2 | 1.1E+05           | 64.1 $\pm$ 6.2            | 27.9 $\pm$ 12.0         | 0 $\pm$ 0         | 0 $\pm$ 0         | 0 $\pm$ 0         | 22.7 $\pm$ 8.9                     |

## References

Lu, J.; Zhu, B.; Struewing, I.; Xu, N.; Duan, S. Nitrogen–phosphorus-associated metabolic activities during the development of a cyanobacterial bloom revealed by metatranscriptomics. *Sci. Rep.* 2019, 9, 2480.
